# Supplementary material for: Adaptive Evolution of Eel Fluorescent Proteins from Fatty Acid Binding Proteins Produces Bright Fluorescence in the Marine Environment
Source: PubMed Central journal article supplement (PMC4641735; doi:10.1371/journal.pone.0140972), 2015-11-11
Supplement: pone.0140972.s002.pdf [file pone.0140972.s002.pdf]

ML

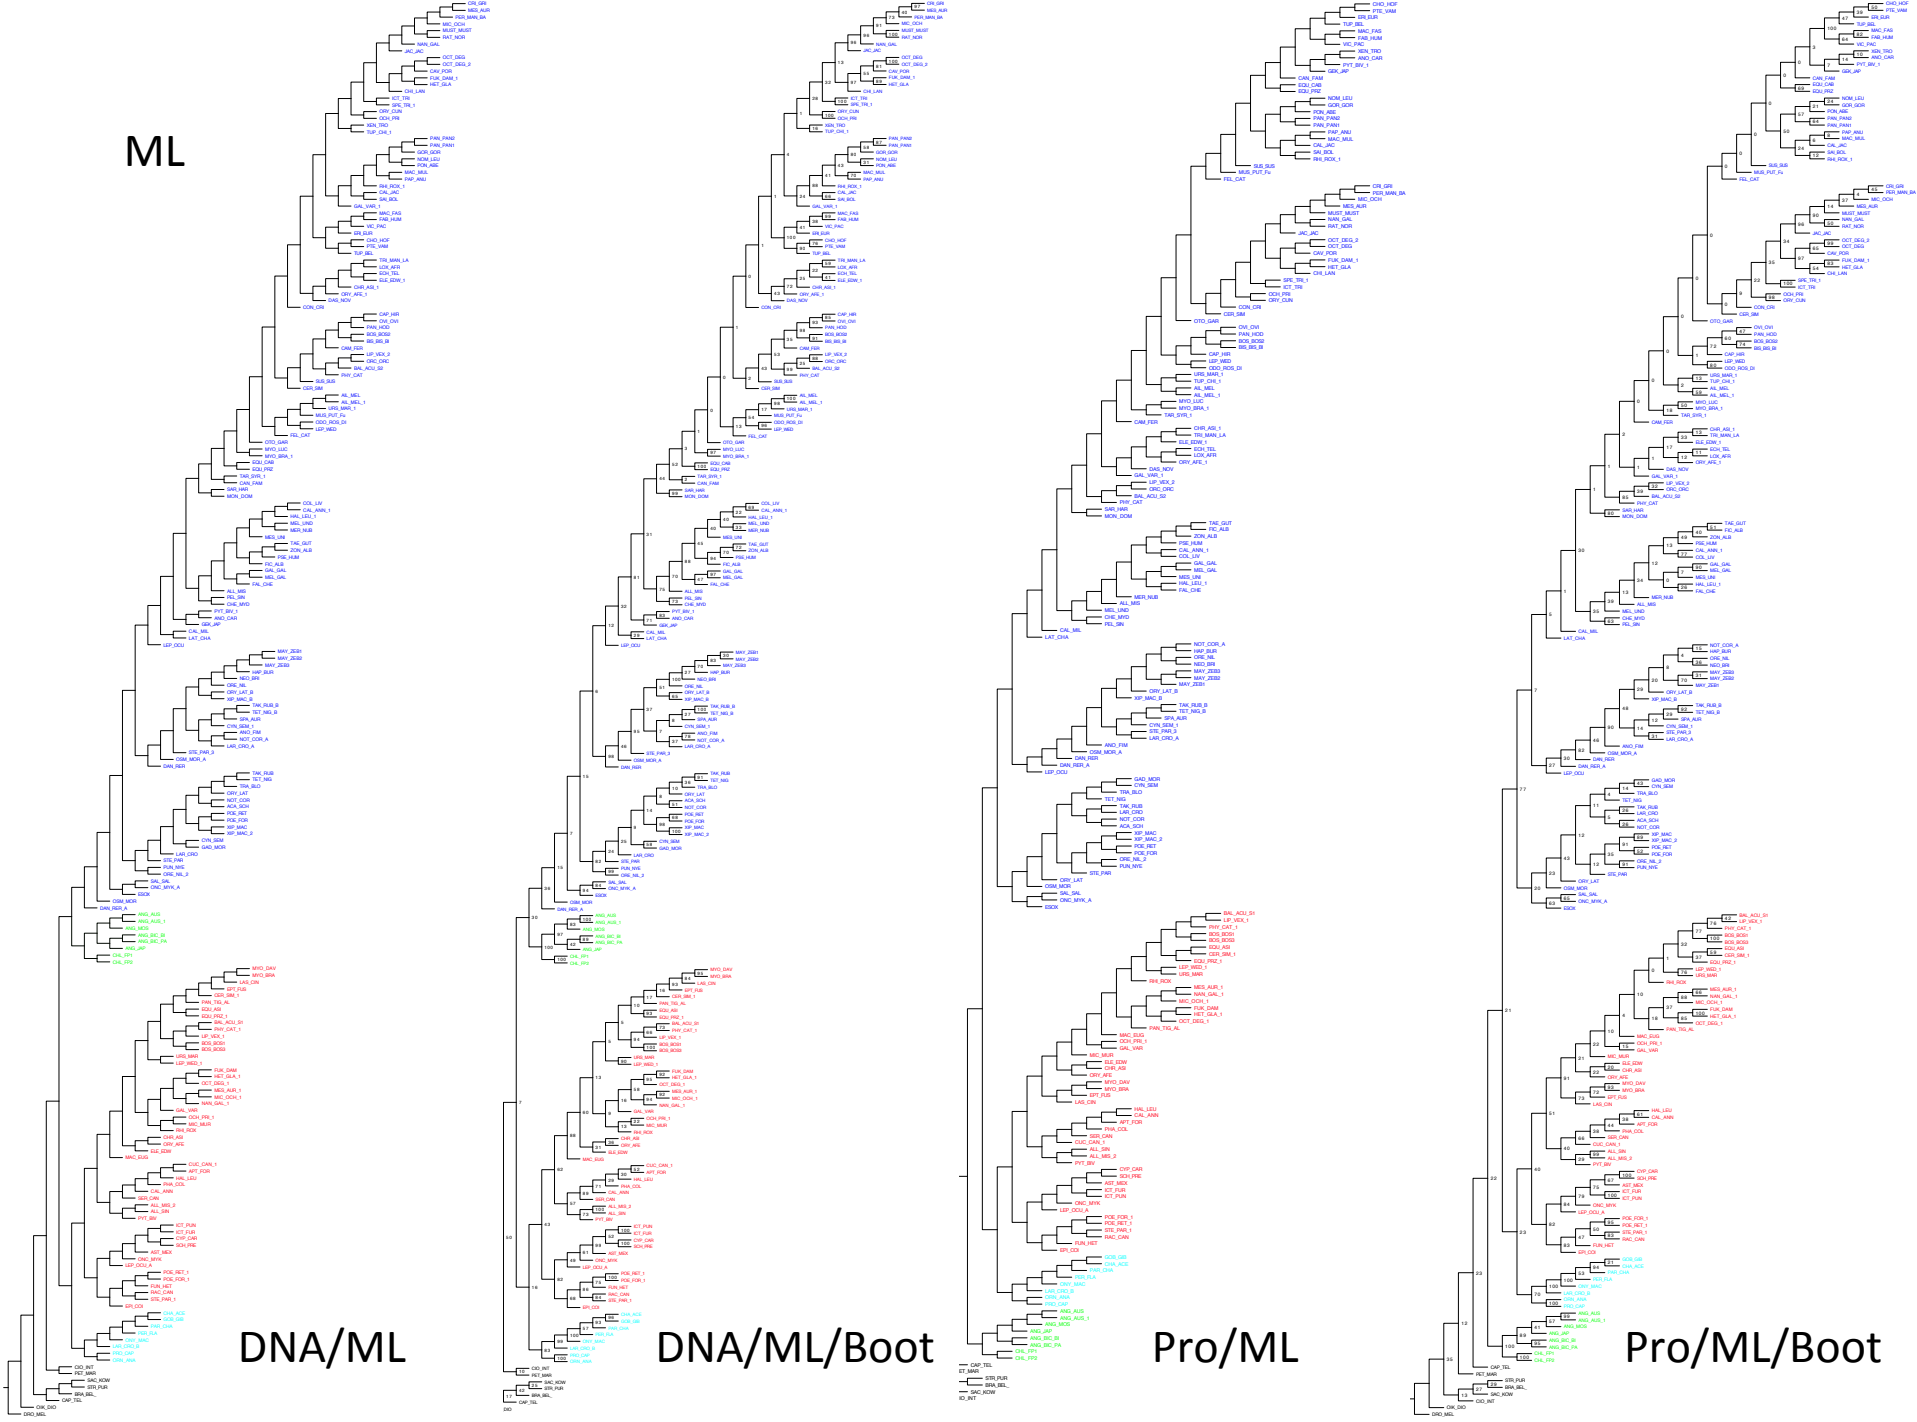

DNA/ML

DNA/ML/Boot

Pro/ML

Pro/ML/Boot
