# Supplementary material for: Adaptive Evolution of Eel Fluorescent Proteins from Fatty Acid Binding Proteins Produces Bright Fluorescence in the Marine Environment
Source: PubMed Central journal article supplement (PMC4641735; doi:10.1371/journal.pone.0140972), 2015-11-11

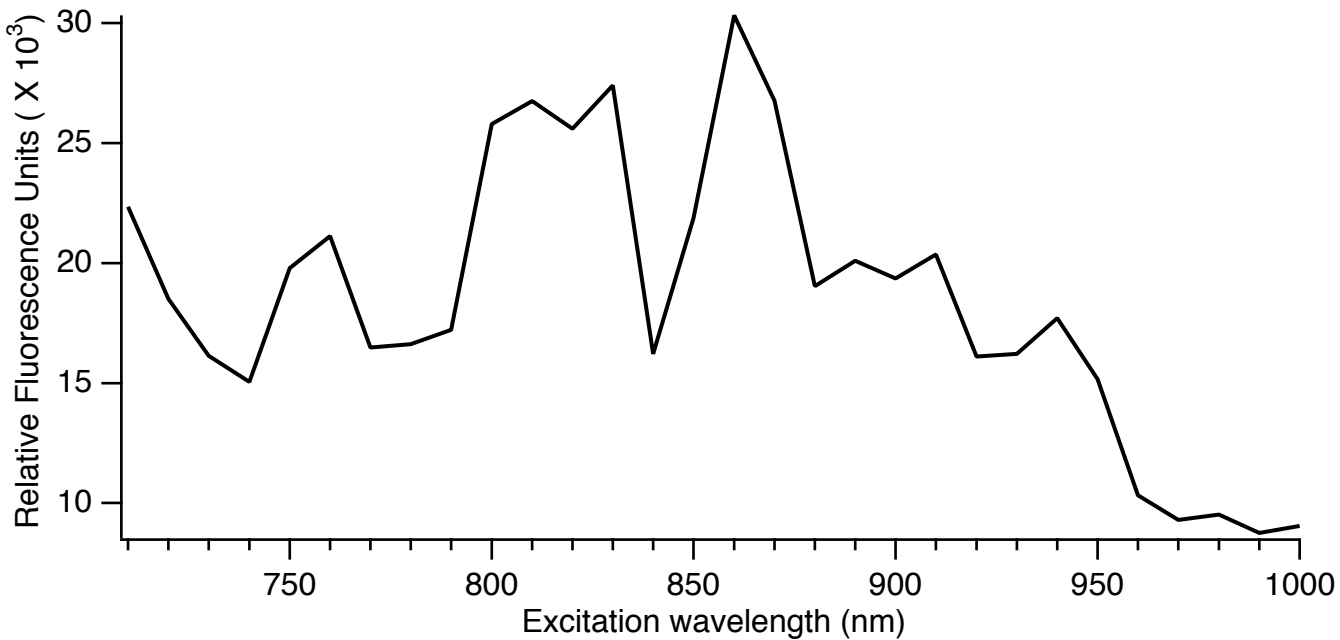

Supplement: pone.0140972.s004.pdf [file pone.0140972.s004.pdf]
